# Supplementary material
Source: publisher figshare collection journal article supplement (https://acs.figshare.com/ndownloader/files/11609120)
Supplement: Supplementary file 1 [file 11609120]

## *Supplementary Information*

### **The Large Electrocaloric Effect in Lead-free Ba(Hf<sub>x</sub>Ti<sub>1-x</sub>)O<sub>3</sub>**

### **Ferroelectric Ceramics for Clean Energy Applications**

**Ming-Ding Li<sup>1</sup>, Xin-Gui Tang<sup>1\*</sup>, Si-Ming Zeng<sup>2</sup>, Qiu-Xiang Liu<sup>1</sup>, Yan-Ping Jiang<sup>1</sup>,**

**Tian-Fu Zhang<sup>1</sup> and Wen-Hua Li<sup>1</sup>**

<sup>1</sup> School of Physics & Optoelectric Engineering, Guangdong University of Technology, No 100

Waihuan Xi Road, Guangzhou 510006, China.

<sup>2</sup> Laboratory Teaching Centre, Guangdong University of Technology, No 100 Waihuan Xi Road,

Guangzhou 510006, China.

\*Corresponding author, E-mail: xgtang@gdut.edu.cn (X.G. Tang);

Fax: +86-20-3932 2265

Total number of pages: 4

Total number of figures: 2

#### **Table of Contents**

- 1. Experimental section.....S2**
- 2. Figure S1: the pyroelectric coefficient  $\partial P/\partial T$  as a function of temperature of BHT.....S3**
- 3. Figure S2: Isothermal entropy change  $\Delta S$  as a function of temperature of BHT.....S4**

## EXPERIMENTAL SECTION

The BHT ( $x=0.03, 0.05, 0.08$  and  $0.11$ ) ceramics synthesized by a solid-state process. Reagent-grade  $\text{BaCO}_3$ ,  $\text{TiO}_2$  and  $\text{HfO}_2$  powders were batched stoichiometrically according to the nominal compositions BHT. Raw powders were ball milled in alcohol for 24 h and dried, followed by calcinations at  $1100\text{ }^\circ\text{C}$  for 2 h. The calcined powders were mixed with alcohol milling for 16 h and dried. After that, they were mixed thoroughly with a Polyvinyl butyral (PVB) binder solution and uniaxially pressed into discs of 12 mm in diameter pellet. These discs were sintered at  $1450\text{ }^\circ\text{C}$  for 5 h in air. Silver paste was painted on both surfaces of the disc samples and then fired at  $650\text{ }^\circ\text{C}$  to form the electrode.

The crystal structures of the sintered ceramics were characterized using X-ray diffraction (XRD, Rigaku ULTIMA-III). The surface microstructure of BHT ceramics were obtained by a scanning electron microscopy (SEM, S-3400N, Hitachi, Japan). Dielectric measurements were performed using a Agilent E4980A in the frequency range from 100 Hz to 1 MHz and in the temperature range from 25 to  $600\text{ }^\circ\text{C}$  with a heating rate of  $3\text{ }^\circ\text{C}/\text{min}$ .  $P$ - $E$  loops were obtained by a ferroelectric test system (Premier II, Radiant Technology, USA).

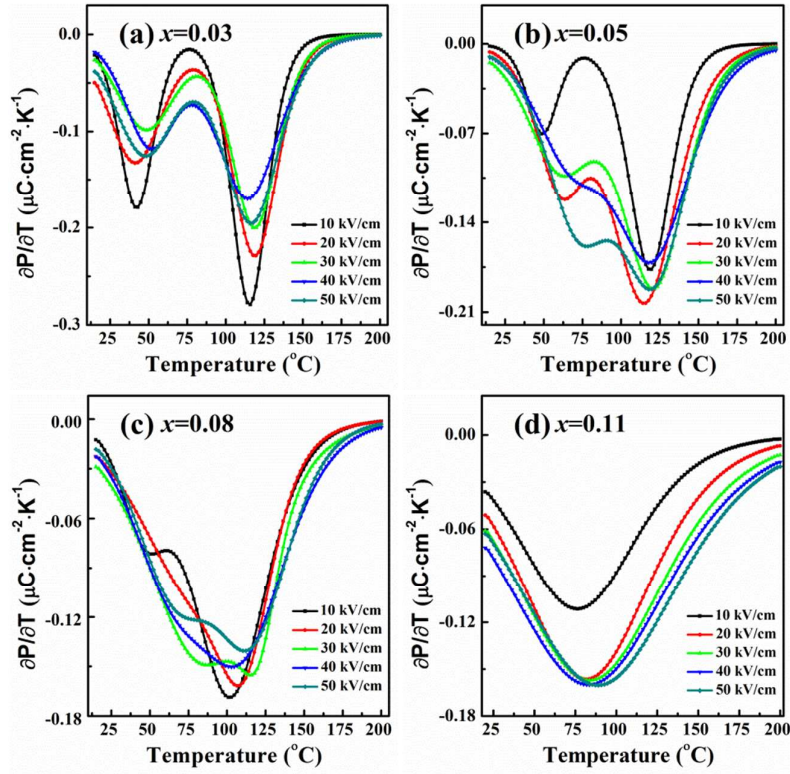

**Figure S1.** The pyroelectric coefficient  $\partial P/\partial T$  as a function of temperature of BHT (a)  $x = 0.03$ , (b)  $x = 0.05$ , (c)  $x = 0.08$ , (d)  $x = 0.11$  ceramics at various electric fields.

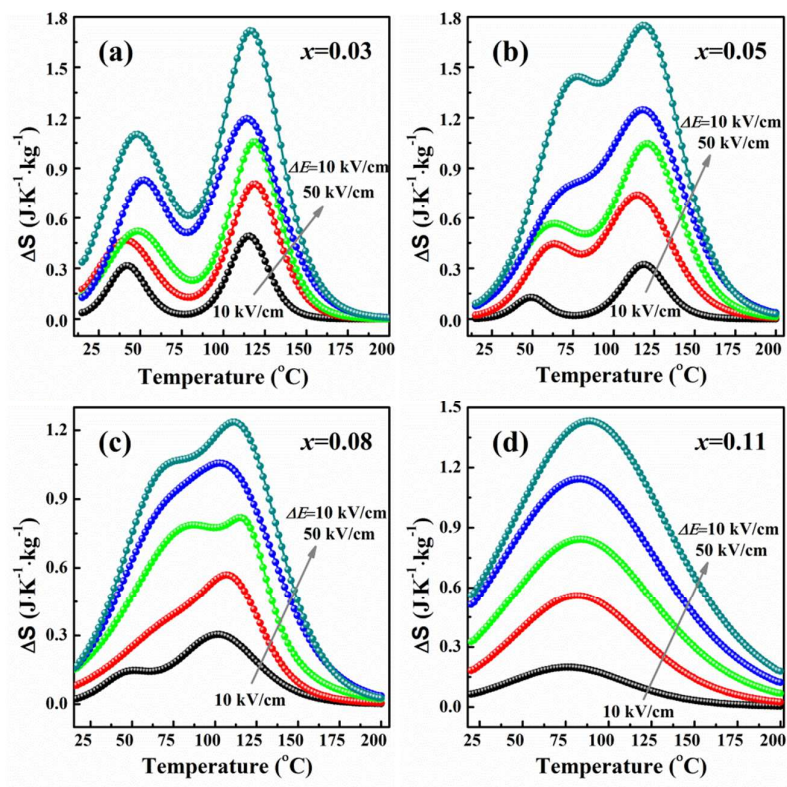

**Figure S2.** Isothermal entropy change  $\Delta S$  as a function of temperature of BHT (a)  $x = 0.03$ , (b)  $x = 0.05$ , (c)  $x = 0.08$ , (d)  $x = 0.11$  ceramics at various electric fields.
